# Supplementary material for: Significance and Biological Importance of Pyrimidine in the Microbial World
Source: PubMed Central journal article supplement (PMC4207407; doi:10.1155/2014/202784), 2014-03-23
Supplement: 202784.f1.pdf [file 202784.f1.pdf]

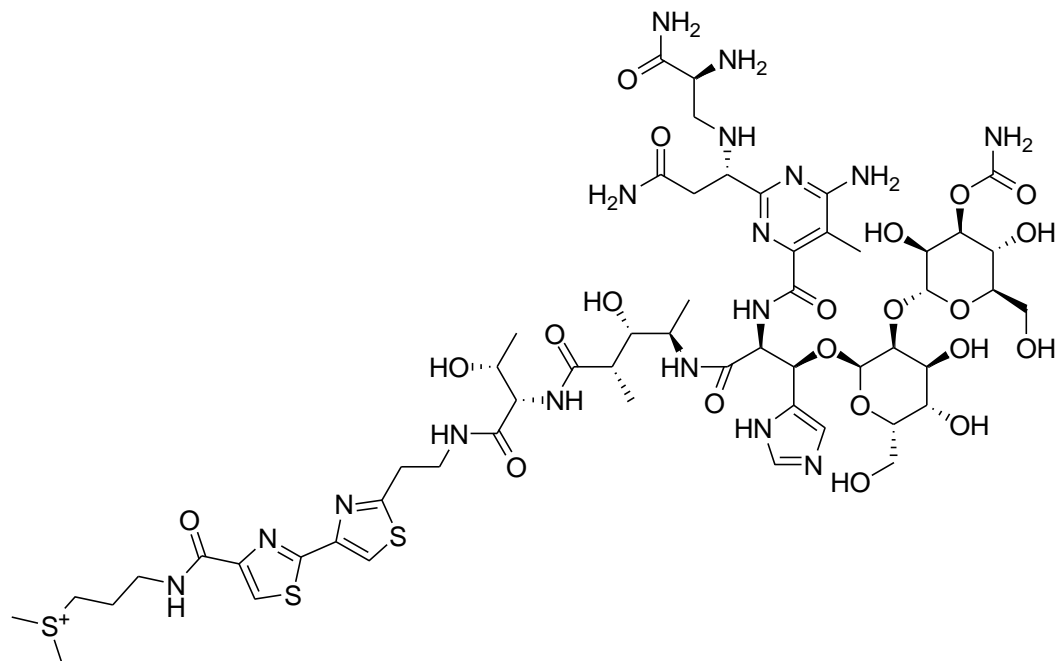

**Figure S1** Bleomycin

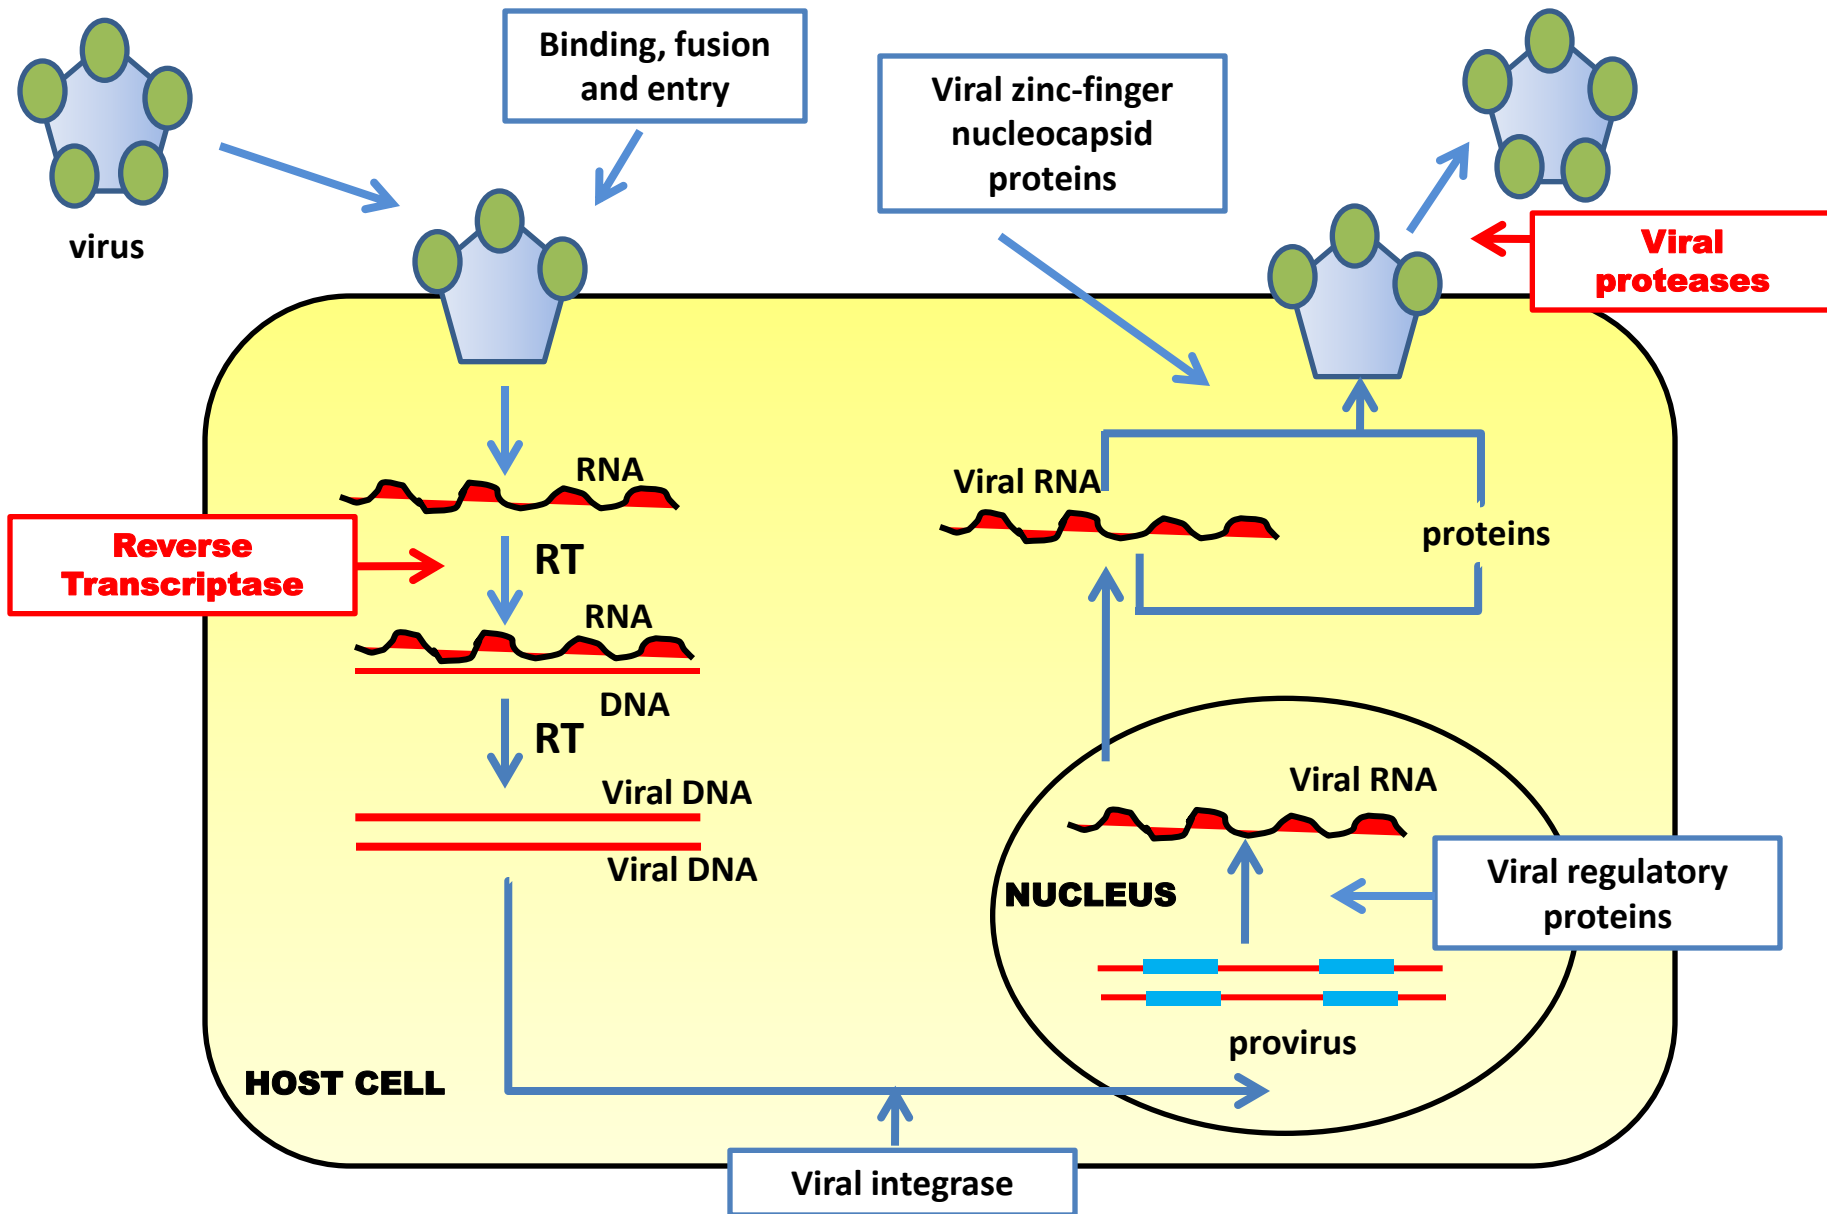

**Figure S2** Antiviral actions of pyrimidine analogs ex. ganciclovir is phosphorylated first by viral kinase to the monophosphate. This intermediate are then phosphorylated by host cell kinase to the nucleotide analogs that inhibit viral replication.
